# Supplementary material for: A Fruit-Expressed MYB Transcription Factor Regulates Anthocyanin Biosynthesis in Atropa belladonna
Source: MDPI journal article supplement (doi:10.3390/ijms25094963), 2024-05-02
Supplement: s1 [file s1]

```

1          cggccgggggactttacctaactgctttgcctgaactcaatgattggagttctctttttccattttggcgctc
96  ATGAATTCTACTAGTAGTACTAAATCATCAGAGGTCAGGAAAGGTGCATGGACCGAAGAAGAAGATCTACTTTTGAGAAAAATGTATTGAC
    M N S T S S T K S S E V R K G A W T E E E D L L L R K C I D
186  AAGTACGGTGAAGGAAAGTGGCATCAAATTCCTAGAGCTGGTCTAAATAGATGCAGAAAGAGCTGCAGACTGAGGTGGTTGAATTAT
    K Y G E G K W H Q I P I R A G L N R C R K S C R L R W L N Y
276  CTAAGGCCACATATTAAGAGAGGTGACTTCGCTTCGGATGAAATAGATCTCATCTTCAGGCTTCATAAGCTCTTAGGCAACAGATGGTCA
    L R P H I K R G D F A S D E I D L I F R L H K L L G N R W S
366  CTTATTGCTGGTAGACTTCGGGAAGAACAGCAAACGATGTGAAAAATTACTGGAACACACCTACATAGAAAGTTAATTTCCTCCTCAG
    L I A G R L P G R T A N D V K N Y W N T H L H R K L I S P Q
456  AGACAGGAGAGAAAGTACAATAATGCCCTCAAGATCACTGAAAACACCATAATAAGACCTTGGCCTCGGACCTTCTCAAGTGCAACGAAA
    R Q E R K Y N N A L K I T E N T I I R P W P R T F S S A T K
546  CCTTGGTGCAACAACAAAAGTATCACAAATACAATAGACAAAGACATCGCAACAACGAAACAGTACTAAATATTTGTGAGAAGCCA
    P W C N N K S I T N T I D K D K H R N N E T V L N I C E K P
636  ACAGGCGAAACAACGAGGTCGTCGATGGACGAGGGAGTTCAATGGTGGACAAGTTTACTGGAAAAATTGCAATGAATTTGAGGAAGCAGTT
    T G E T T R S S M D E G V Q W W T S L L E N C N E F E E A V
726  GGGAGATTTGATGAAGAAAATAAGTTACCAAGTTTGTGTCATGACGAAAACTCACCGCCAATGCAAGAAGGACAAAGTGATGGCTGGAAT
    G R F D E E N K L P S L L H D E N S P P M Q E G Q S D G W N
816  GACTTTTCTGCTGATATTGACCTATGGGATCTACTTAATTAAtttagtttcatcaatcaccattaacacatagataattaatggtattg
    D F S A D I D L W D L L N *
906  tgtacttgtaatagggatacattctattctatgccgtttgaactttgtatcccaagtacaagtagggatctattactattttcattctag
996  agtttaatttataattataccgtggaaaaaattttacatc

```

**Figure S1.** The cDNA sequence and derived amino acids sequence of *AbMYB1*.

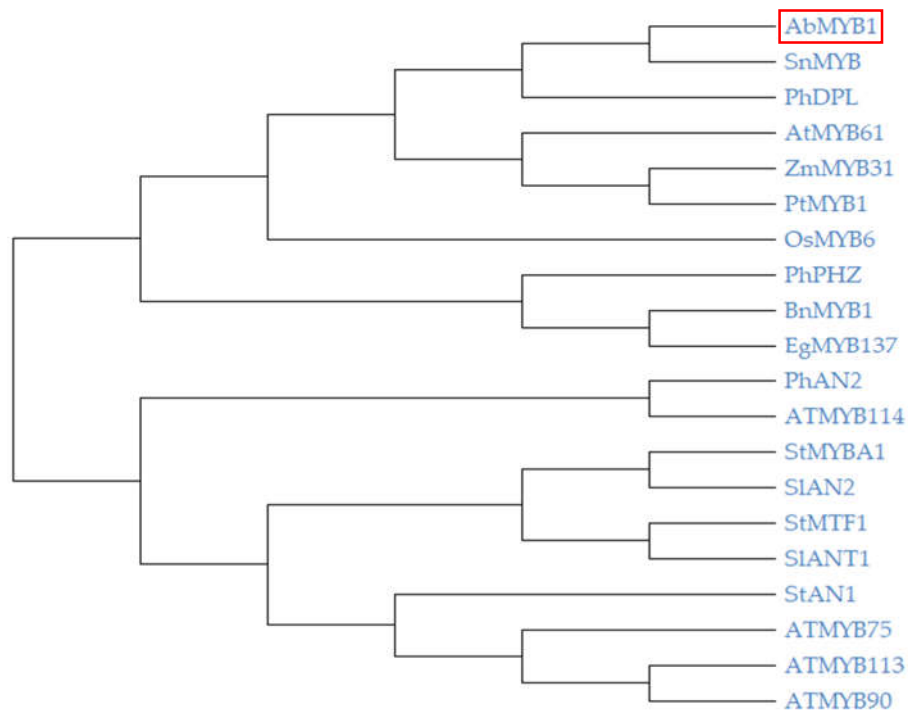

**Figure S2. The Phylogenetic Relationships of AbMYB1 with Other R2R3-MYBs.** *Solanum nigrum* (Sn), *Petunia hybrid* (Ph), *Zea mays* (Zm), *Pinus taeda* (Pt), *Oryza sativa* (Os), *Boehmeria nivea* (Bn), *Eucalyptus gunnii* (Eg), *Solanum tuberosum* (St), *Solanum lycopersicum* (Sl), *Arabidopsis thaliana* (At). SnMYB (AVT28142.1), PhDPL (ADQ00394.1), ZmMYB31 (NP\_001105949.2), PtMYB1 (AAQ62541.1), AtMYB61 (AT1G09540), OsMYB6 (QBM91277.1), BnMYB1 (AXF84304.1), PhPHZ (ADW94951.1), EgMYB137 (APX44023.1), PhAN2 (AUH28246.1), StMYBA1 (ALA13582.1), SIAN2 (NP\_001265992.1), StMTF1 (EU310399), SIANT1 (NP\_001234417.1), StAN1 (AAX53093.1), ATMYB75 (AT1G56650.1), ATMYB114 (AT1G66380.1), ATMYB113 (AT1G66370.1), ATMYB90 (AT1G66390.1).

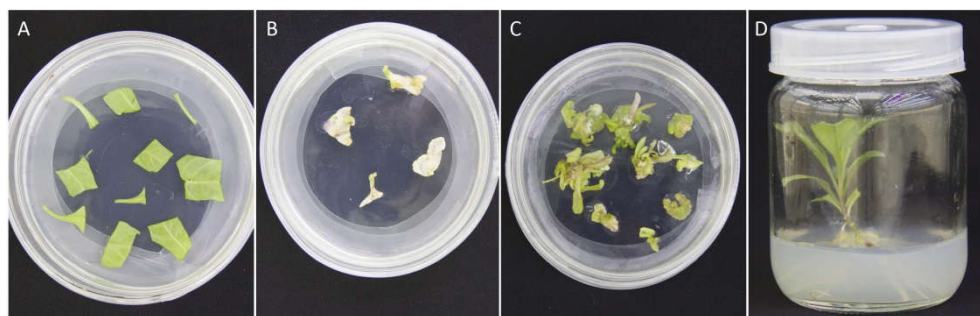

**Figure S3. The process of agrobacterium-mediated genetic transformation.** (A), Leaf discs co-cultured with agrobacterium; (B) Resistant callus; (C) Resistant buds on rooting medium; (D) Regenerated plants.

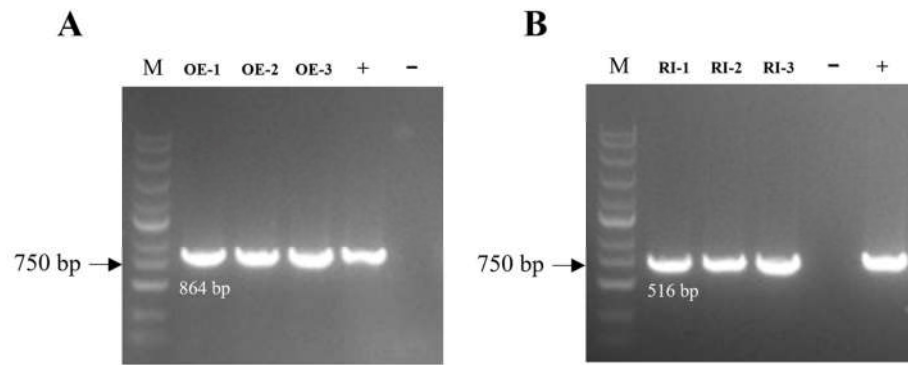

**Figure S4. Detection of transgenic plants by PCR.** (A) Target gene detection in *AbMYB1*-overexpression plants. (B) Target gene detection in *AbMYB1*-RNAi plants. M, Marker (15000 bp-100 bp); +, Positive control (recombinant plasmid containing the target gene); -: Negative control (wild type *A. belladonna*); OE-1, OE-2 and OE-3: the *AbMYB1*-overexpression transgenic plant lines; RI-1, RI-2 and RI-3: the *AbMYB1*-RNAi transgenic plant lines.

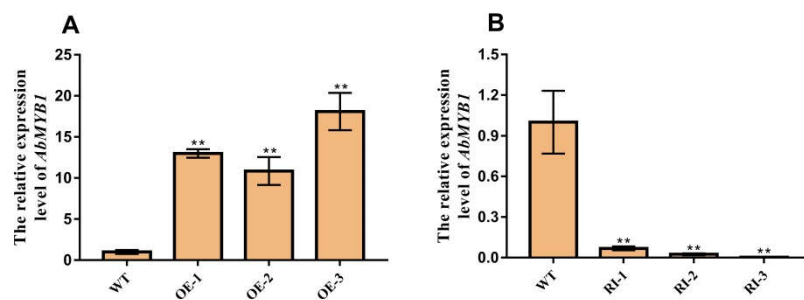

**Figure S5. The *AbMYB1* expression levels in the flowers of transgenic lines.** (A) Relative expression of *AbMYB1* in *AbMYB1*-overexpression plants. (B) Relative expression of *AbMYB1* in *AbMYB1*-RNAi lines. WT, wild type *A. belladonna*; OE-1, OE-2 and OE-3: the *AbMYB1*-overexpression transgenic plant lines; RI-1, RI-2 and RI-3: the *AbMYB1*-RNAi transgenic plant lines; \*\* means significant difference in T test ( $P < 0.01$ ).

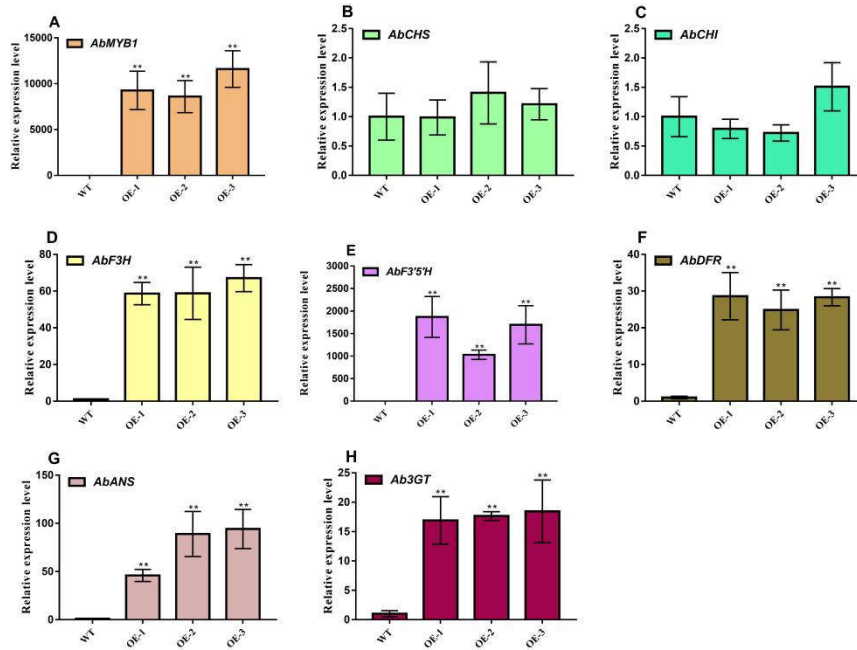

**Figure S6. The relative expression of genes related to anthocyanin biosynthesis in *A. belladonna* leaves.** A, the expression level of *AbMYB1* in different lines; B, the expression level of *AbCHS* in different lines; C, the expression level of *AbCHI* in different lines; D, the expression level of *AbF3H* in different lines; E, the expression level of *AbF3'5'H* in different lines; F, the expression level of *AbDFR* in different lines; G, the expression level of *AbANS* in different lines; H, the expression level of *Ab3GT* in different lines; WT, the wild type plants; OE-1, OE-2 and OE-3: the *AbMYB1*-overexpression transgenic plant lines; \*\* means significant difference in T test ( $P < 0.01$ ).

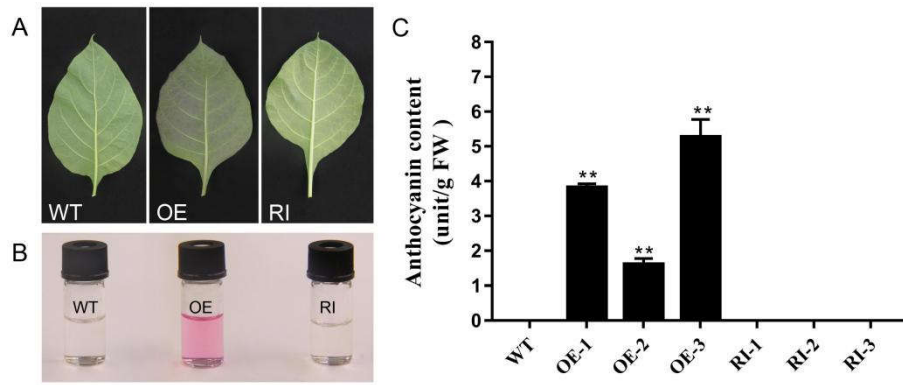

**Figure S7. The anthocyanin accumulation in the leaves of transgenic *A. belladonna* plants.** (A) the anthocyanin accumulation in the leaves of transgenic plant lines and wild type plant lines; (B) total anthocyanin extracted from the leaves of transgenic plant lines and wild type plant lines; (C) total anthocyanin content in the leaves of transgenic plant lines and wild type plant lines. WT, the leaves of wild type plants; OE-1, OE-2 and OE-3: the leaves of *AbMYB1*-overexpression plants; RI-1, RI-2 and RI-3: the leaves of *AbMYB1*-RNAi plants; \*\* means significant difference in T test ( $P < 0.01$ ).

**Table S1.** Primers used in PCR experiments.

| Primers   | Sequences (5'-3')                         | Application                                  |
|-----------|-------------------------------------------|----------------------------------------------|
| F-cAbMYB1 | CGGCCGGGGGACTTTACCTCACGT                  | Full length cDNA cloning of <i>AbMYB1</i>    |
| R-cAbMYB1 | GATGTAAAATTTTTTCCACGGTAT                  | Full length cDNA cloning of <i>AbMYB1</i>    |
| qF-AbMYB1 | CGCGGATCCATGAATTCTACTAGTAGTACT            | Analysis of tissue expression profile        |
| qR-AbMYB1 | CGCGAGCTCTTAATTAAGTAGATCCCATA             | Analysis of tissue expression profile        |
| qF-AbPGK  | TCGCTCTTGGAGAAGGTTGAC                     | Analysis of tissue expression profile        |
| qR-AbPGK  | CTTGTCGGCAATCACTACATCAG                   | Analysis of tissue expression profile        |
| qF-CHS    | TCGGGCTACAAGGCAAGTC                       | Gene expression analysis in different stages |
| qR-CHS    | AAAAGCACACCCCAATCAAGG                     | Gene expression analysis in different stages |
| qF-CHI    | AGTTGTCAATGCTCCAGTTG                      | Gene expression analysis in different stages |
| qR-CHI    | GCTCTTCTTCTTCATGTTTATCG                   | Gene expression analysis in different stages |
| qF-F3H    | CCTTCAACACTAACGGCTCTG                     | Gene expression analysis in different stages |
| qR-F3H    | ACCTCTTCTTCCACTCTCAATATC                  | Gene expression analysis in different stages |
| qF-F3'H   | ATTCACCAACCTTAGCCAAAC                     | Gene expression analysis in different stages |
| qR-F3'H   | CTTAGCATCTCCCTCACAAAC                     | Gene expression analysis in different stages |
| qF-F3'5'H | CTTCTCCAATCGTCCACCTAATG                   | Gene expression analysis in different stages |
| qR-F3'5'H | CGAATGTTTGCCCAATCTTCTAAG                  | Gene expression analysis in different stages |
| qF-ANS    | GGAAGAAGGAAGACTGGAGAAG                    | Gene expression analysis in different stages |
| qR-ANS    | CATATTGTGGAGGATGAATGTCAG                  | Gene expression analysis in different stages |
| qF-DFR    | ACTGTTGATGCTCCGATGG                       | Gene expression analysis in different stages |
| qR-DFR    | ATGCTTCACCTTCTTCTTGTTT                    | Gene expression analysis in different stages |
| qF-3GT    | TCCTTCTTCAACACATCACAATCC                  | Gene expression analysis in different stages |
| qR-3GT    | AGTTTCCTCCTCTGCCTCTTTC                    | Gene expression analysis in different stages |
| F-AbMYB1  | CGCGGATCCATGAATTCTACTAGTAGTACT            | Overexpression plasmid construction          |
| R-AbMYB1  | CGCGAGCTCTTAATTAAGTAGATCCCATA             | Overexpression plasmid construction          |
| F-iAbMYB1 | CGCGGTACCAAGCTTCTCATCTTCAGGCTT<br>CATAA   | RNAi plasmid construction                    |
| R-iAbMYB1 | CGCCTCGAGTCTAGATTCTTCATCAAATCT<br>CCCAACT | RNAi plasmid construction                    |
| F-35S     | GACGCACAATCCCACTATCC                      | Identify positive transgenic plants          |
| R-iAbMYB1 | CGCCTCGAGTCTAGATTCTTCATCAAATCT<br>CCCAACT | Identify positive transgenic plants          |
| R-AbMYB1  | 5'-<br>CGCGAGCTCTTAATTAAGTAGATCCCATA      | Identify positive transgenic plants          |



**Table S2.** The genes involved in anthocyanin biosynthesis in *A. belladonna*.

| <b>gene name</b> | <b>gene number</b>                   |
|------------------|--------------------------------------|
| <i>AbCHS</i>     | aba_locus_13102_iso_4_len_1413_ver_  |
| <i>AbCHI</i>     | aba_locus_14819_iso_3_len_853_ver_2  |
| <i>AbF3H</i>     | aba_locus_4270_iso_5_len_1419_ver_2  |
| <i>AbF3'H</i>    | aba_locus_10531_iso_1_len_1673_ver_2 |
| <i>AbF3'5'H</i>  | aba_locus_368_iso_2_len_1707_ver_2   |
| <i>AbDFR</i>     | aba_locus_7485_iso_2_len_1452_ver_2  |
| <i>AbANS</i>     | aba_locus_408_iso_2_len_1550_ver_2   |
| <i>Ab3GT</i>     | aba_locus_729_iso_1_len_1448_ver_2   |
